# Supplementary material for: Engraftment of self-renewing endometrial epithelial organoids promotes endometrial regeneration by differentiating into functional glands in rats
Source: Front Bioeng Biotechnol. 2024 Dec 11;12:1449955. doi: 10.3389/fbioe.2024.1449955 (PMC11668608; doi:10.3389/fbioe.2024.1449955)
Supplement: Supplementary file 4 [file Table1.XLSX]

## Sheet: Table S1
Table S1. Overview of Expansion Medium (ExM) components for rEEOs.
Factor	Manufacturer	Place of production	Catalog no.	Usage concentration
B27 supplement minus vitamin A	Thermo Fisher Scientific	Waltham, MA, USA	12587010	0.02
N2 supplement	Thermo Fisher Scientific	Waltham, MA, USA	17502048	0.01
Insulin-transferrin-selenium	Thermo Fisher Scientific	Waltham, MA, USA	41400045	0.01
Nicotinamide	MCE	NJ, USA	HY-B0150	1 mM
Recombinant Rat EGF	PeproTech	Rocky Hill, NJ, USA	400-25	50 ng/ml
Recombinant Mouse FGF-10	Biolegend	San Diego, CA, USA	751006	50 ng/ml
Recombinant Murine Noggin	PeproTech	Rocky Hill, NJ, USA	250-38	100 ng/ml
A8301	MCE	NJ, USA	HY10432	0.5 µM
Y27632	MCE	NJ, USA	HY-10071	9 µM
Recombinant Murine Wnt-3a	PeproTech	Rocky Hill, NJ, USA	315-20	80ng/ml
Recombinant Murine R-Spondin-1	PeproTech	Rocky Hill, NJ, USA	315-32	200 ng/ml
